# Supplementary material for: Human monoclonal antibodies against chikungunya virus target multiple distinct epitopes in the E1 and E2 glycoproteins
Source: PubMed Central journal article supplement (PMC6837291; doi:10.1371/journal.ppat.1008061), 2019-11-07
Supplement: ppat.1008061.s001.pdf [file ppat.1008061.s001.pdf]

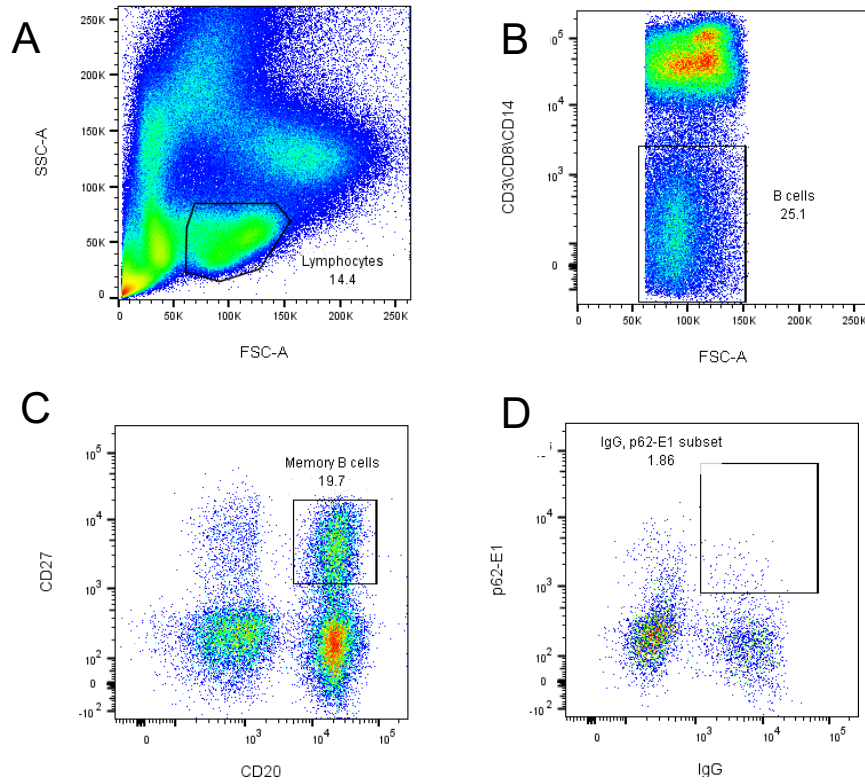

**Figure S1. Representative FACS Sort of Patient-Derived PBMCs.** Cells were filtered for size and granularity (A), then (in this case) CD3<sup>+</sup>/CD8<sup>+</sup>/CD14<sup>+</sup> cells eliminated (B). The CD27<sup>+</sup> / CD20<sup>hi</sup> / IgG<sup>+</sup> / p62-E1<sup>+</sup> B cells (C and D) were collected in individual wells. In some samples, both CD20<sup>hi/lo</sup> populations were carried forward.
