# Supplementary material for: Human monoclonal antibodies against chikungunya virus target multiple distinct epitopes in the E1 and E2 glycoproteins
Source: PubMed Central journal article supplement (PMC6837291; doi:10.1371/journal.ppat.1008061), 2019-11-07
Supplement: ppat.1008061.s003.pdf [file ppat.1008061.s003.pdf]

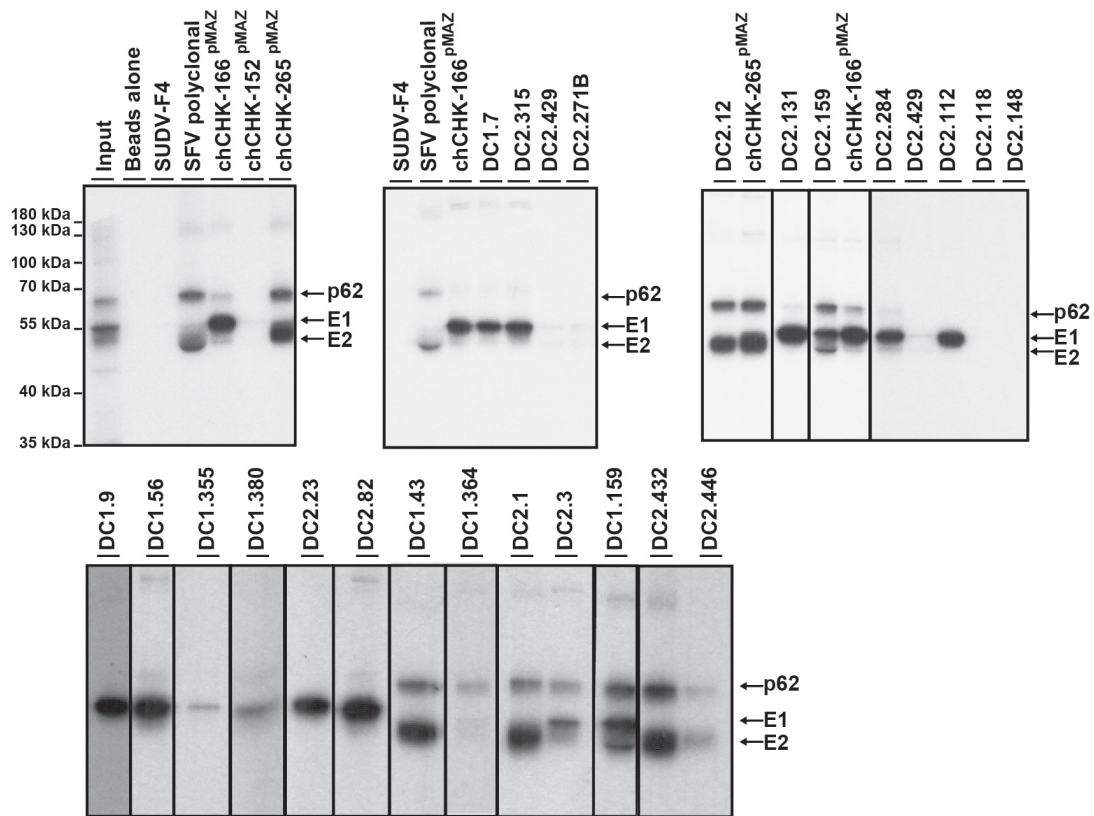

**Figure S3. Immunoprecipitation of viral proteins from infected cells.** BHK-21 cells were inoculated with CHIK 181/25 for 8 h, labeled with [<sup>35</sup>S]methionine/cysteine for 2 h, and lysed on ice. Approximately 1 µg of the indicated mAbs or 2 µL of a control SFV polyclonal antibody (Sanchez-San Martin et al., 2013) was incubated with lysate for 1 h in the presence of 0.1% SDS. The immunoprecipitate was retrieved with Protein A agarose, and the samples were reduced and alkylated and analyzed by SDS-PAGE and fluorography. The lower migrating immunoprecipitated protein is E2, the middle is E1, and the upper is p62 (arrows) as demonstrated by control antibodies (chCHK-166<sup>pMAZ</sup>:E1, chCHK-265<sup>pMAZ</sup>:E2/p62, and SFV polyclonal antibody:E2/p62). Only some mAbs resulted in an IP; data for all other mAbs were negative. Reference: Sanchez-San Martin, C., Nanda, S., Zheng, Y., Fields, W., and Kielian, M. (2013). Cross-inhibition of chikungunya virus fusion and infection by alphavirus E1 domain III proteins. *Journal of virology* 87, 7680-7687.
