# Supplementary material for: Human monoclonal antibodies against chikungunya virus target multiple distinct epitopes in the E1 and E2 glycoproteins
Source: PubMed Central journal article supplement (PMC6837291; doi:10.1371/journal.ppat.1008061), 2019-11-07
Supplement: ppat.1008061.s006.pdf [file ppat.1008061.s006.pdf]

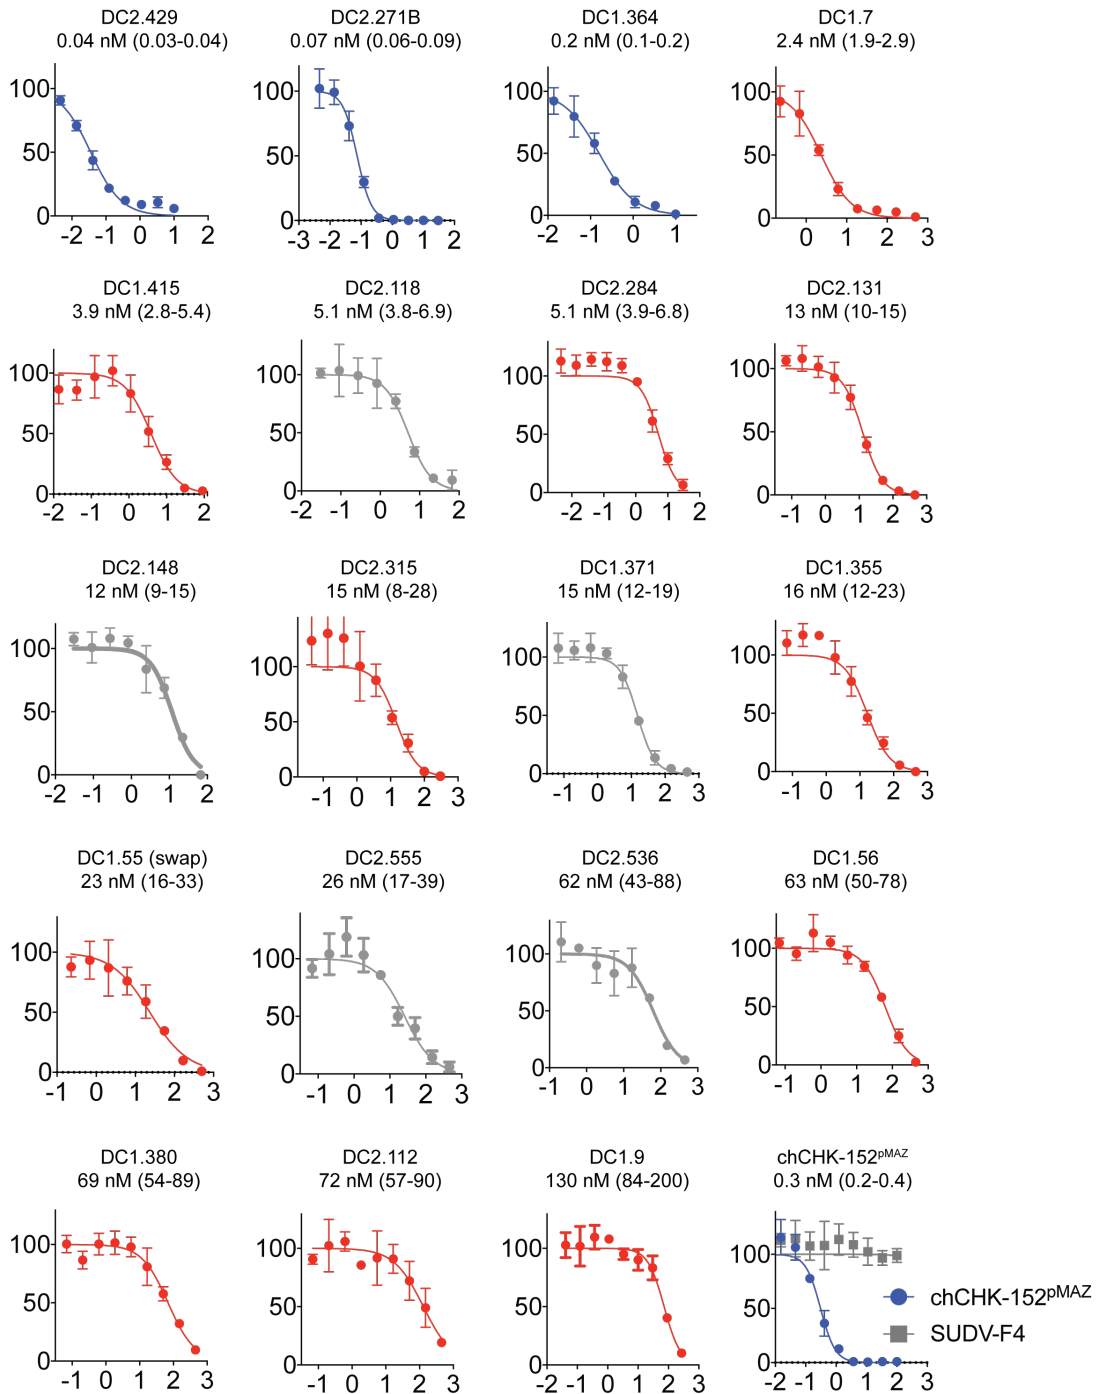

**Figure S6. Neutralization Curves of Human mAbs against CHIKV 181/25.** For each mAb, a representative dataset performed in triplicate from two or more independent experiments is shown (IC<sub>50</sub> values were consistent among experiments). Points represent the mean  $\pm$  SD.

Curves are color-coded according to epitope designation (blue, p62-E1 specific; red, E1-specific; gray, undefined). The IC<sub>50</sub> value is provided, along with 95% confidence interval from curve fitting (these values are also shown graphically in **Fig. 3B** of the main text).
