# Supplementary material for: Human monoclonal antibodies against chikungunya virus target multiple distinct epitopes in the E1 and E2 glycoproteins
Source: PubMed Central journal article supplement (PMC6837291; doi:10.1371/journal.ppat.1008061), 2019-11-07
Supplement: ppat.1008061.s007.pdf [file ppat.1008061.s007.pdf]

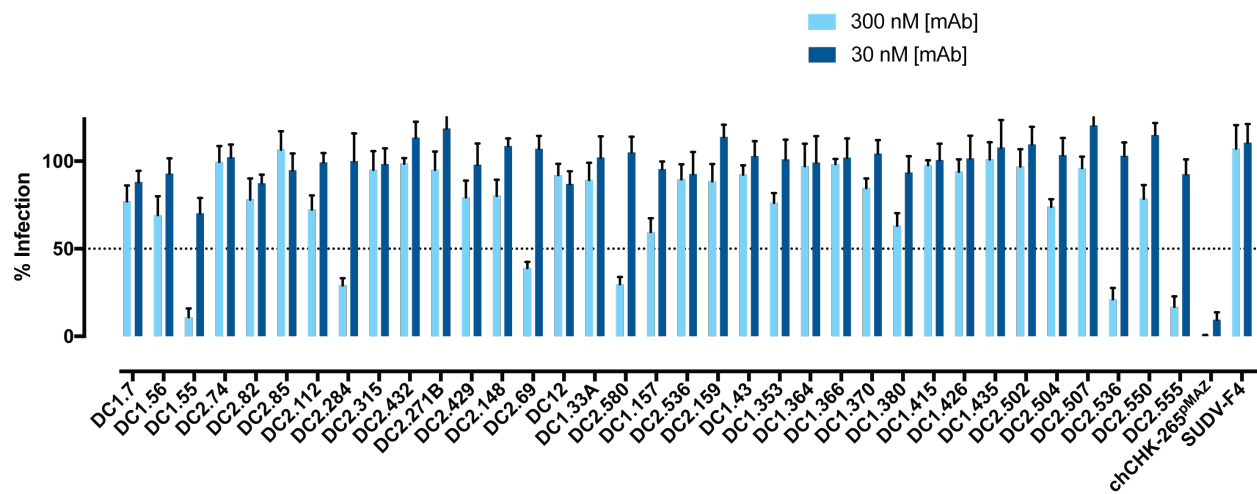

**Figure S7. Screening of 35 mAbs for Neutralizing Activity against MAYV.** mAbs were tested at 30 nM and 300 nM; chCHK-265<sup>pMAZ</sup> and SUDV-F4 were included as controls. Experiments performed in triplicate, each bar represents mean  $\pm$  SD.
