# Supplementary material for: Human monoclonal antibodies against chikungunya virus target multiple distinct epitopes in the E1 and E2 glycoproteins
Source: PubMed Central journal article supplement (PMC6837291; doi:10.1371/journal.ppat.1008061), 2019-11-07
Supplement: ppat.1008061.s008.pdf [file ppat.1008061.s008.pdf]

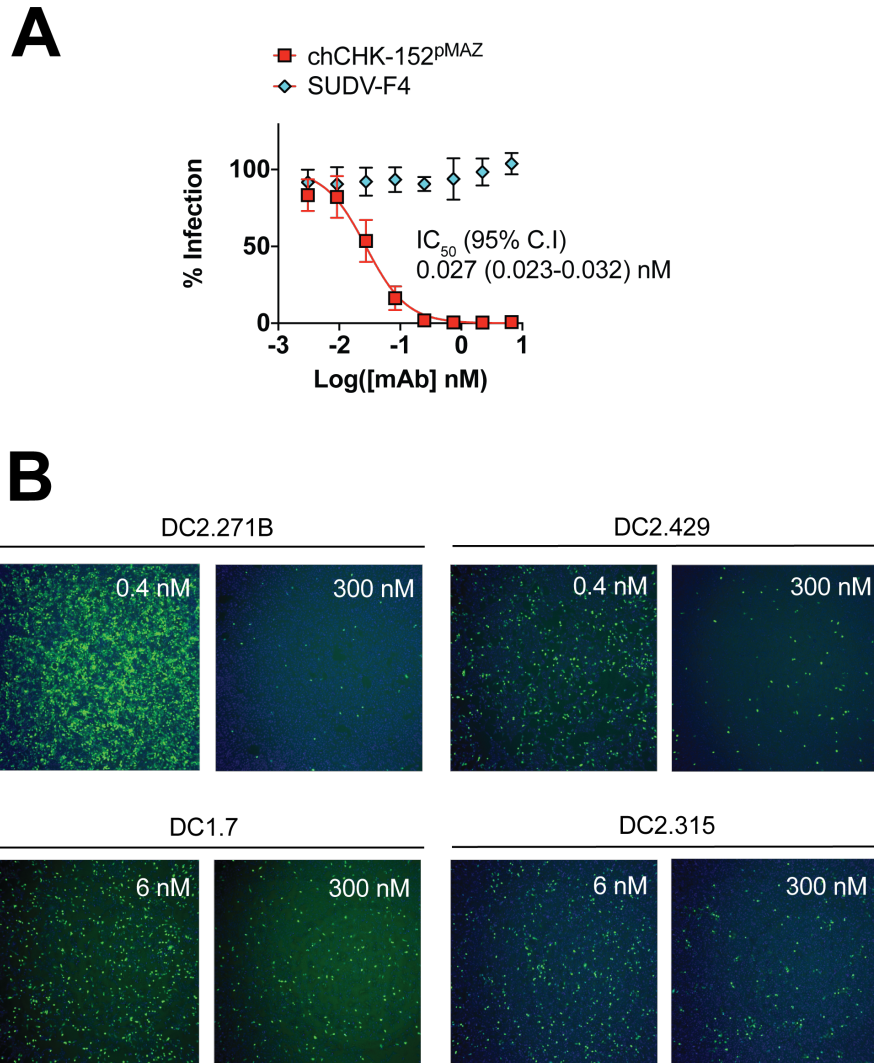

**Figure S8. Neutralization of rVSV-CHIKV by CHIKV mAbs.** (A) Neutralization curve of rVSV-CHIKV by chCHK-152<sup>pMAZ</sup>. A representative dataset from three independent experiments each performed in triplicate is shown. Points represent mean  $\pm$  SD. (B) Images of infected cells at low and high concentrations of DC2.271B, DC2.429, DC1.7, and DC2.315. Quantification of infected cells at several concentrations led to the neutralization curves shown in **Figs. 4B** and **5B**
