# Supplementary material for: Human monoclonal antibodies against chikungunya virus target multiple distinct epitopes in the E1 and E2 glycoproteins
Source: PLOS journal article supplement (doi:10.1371/journal.ppat.1008061), 2019-11-07
Supplement: S2 (10.1371/journal.ppat.1008061.s002) [file journal.ppat.1008061.s002]

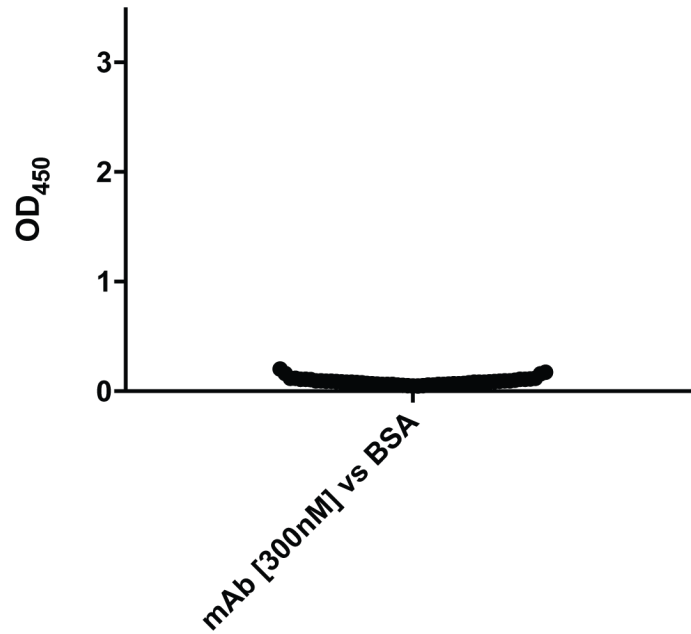

**Figure S2. Single-Point ELISA of mAbs (300 nM) against Wells Coated with BSA.**

Experiments performed as in Fig. 1D.
