# Supplementary material for: Human monoclonal antibodies against chikungunya virus target multiple distinct epitopes in the E1 and E2 glycoproteins
Source: PLOS journal article supplement (doi:10.1371/journal.ppat.1008061), 2019-11-07
Supplement: S5 (10.1371/journal.ppat.1008061.s005) [file journal.ppat.1008061.s005]

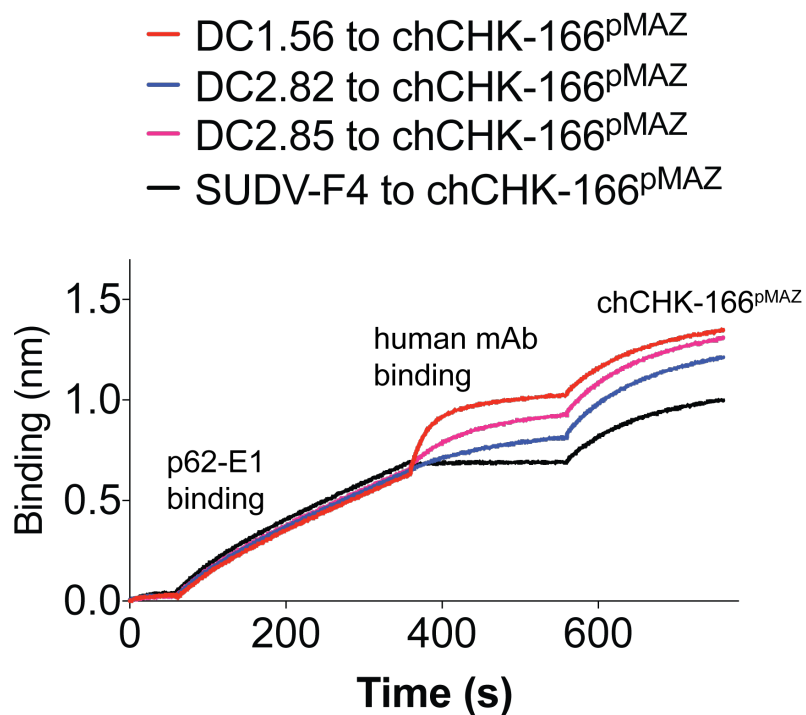

**Figure S5. Competition Studies for E1-Specific mAbs.** The ability of chCHK-166<sup>pMAZ</sup> to engage p62-E1/human mAb complexes was tested in two-phase BLI experiments. SUDV-F4 was included as a negative control. A representative dataset from two independent experiments is shown.
